# Supplementary material for: Frailty and pre-frailty associated with long-term diminished physical performance and quality of life in breast cancer and hematopoietic cell transplant survivors
Source: publisher site journal article supplement (doi:10.18632/aging.206109), 2024-09-26
Supplement: Supplementary file [file aging-v16i18-206109-supplementary-material-SD1.pdf]

SUPPLEMENTARY FIGURE

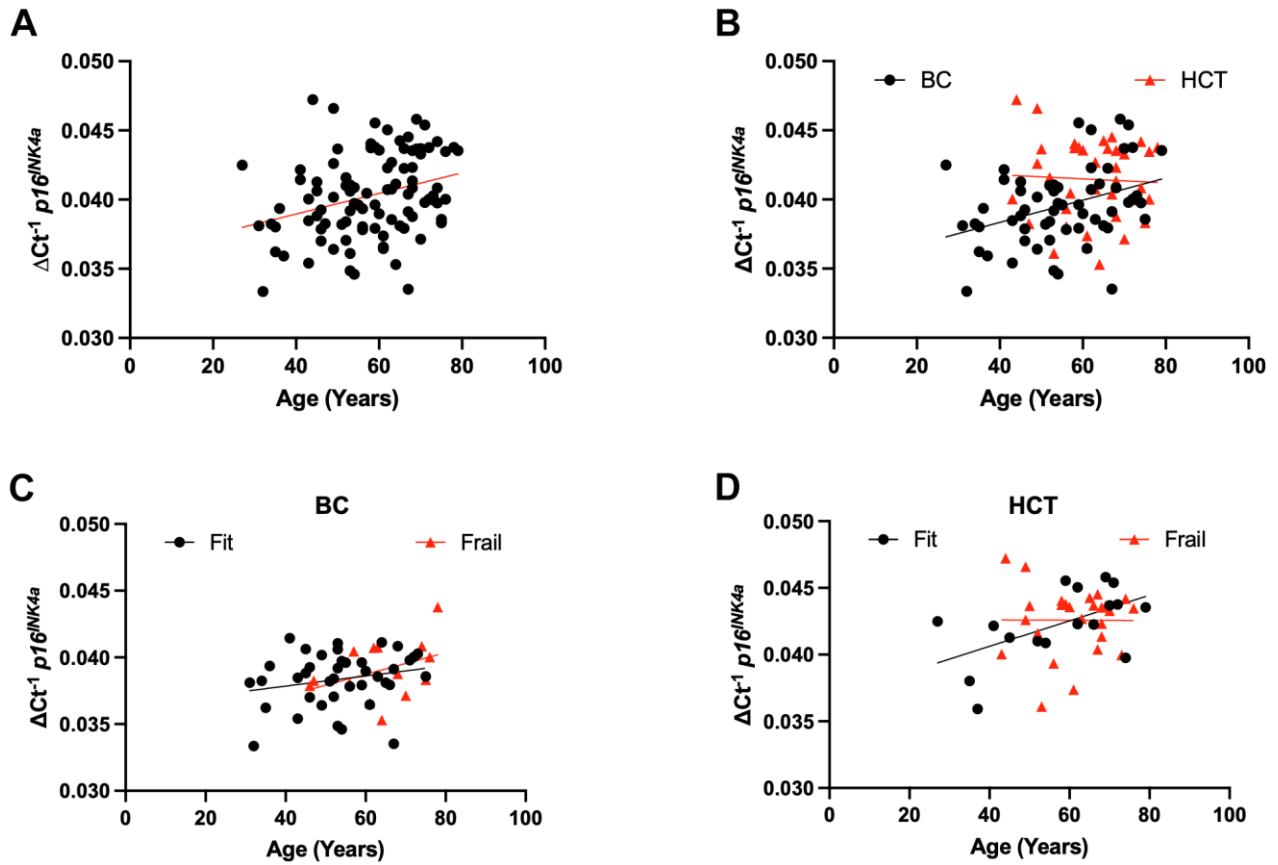

**Supplementary Figure 1. Analysis of  $p16^{INK4a}$  expression with age and disease.** (A)  $p16^{INK4a}$  expression was plotted against age for all subjects and (B) individually for breast cancer (BC) survivors or hematologic malignancy patients treated with allogeneic hematopoietic cell transplantation (HCT). (C, D)  $p16^{INK4a}$  expression was also analyzed with respect to frailty status.
